# Supplementary material
Source: PubMed Central journal article supplement (PMC2200808)

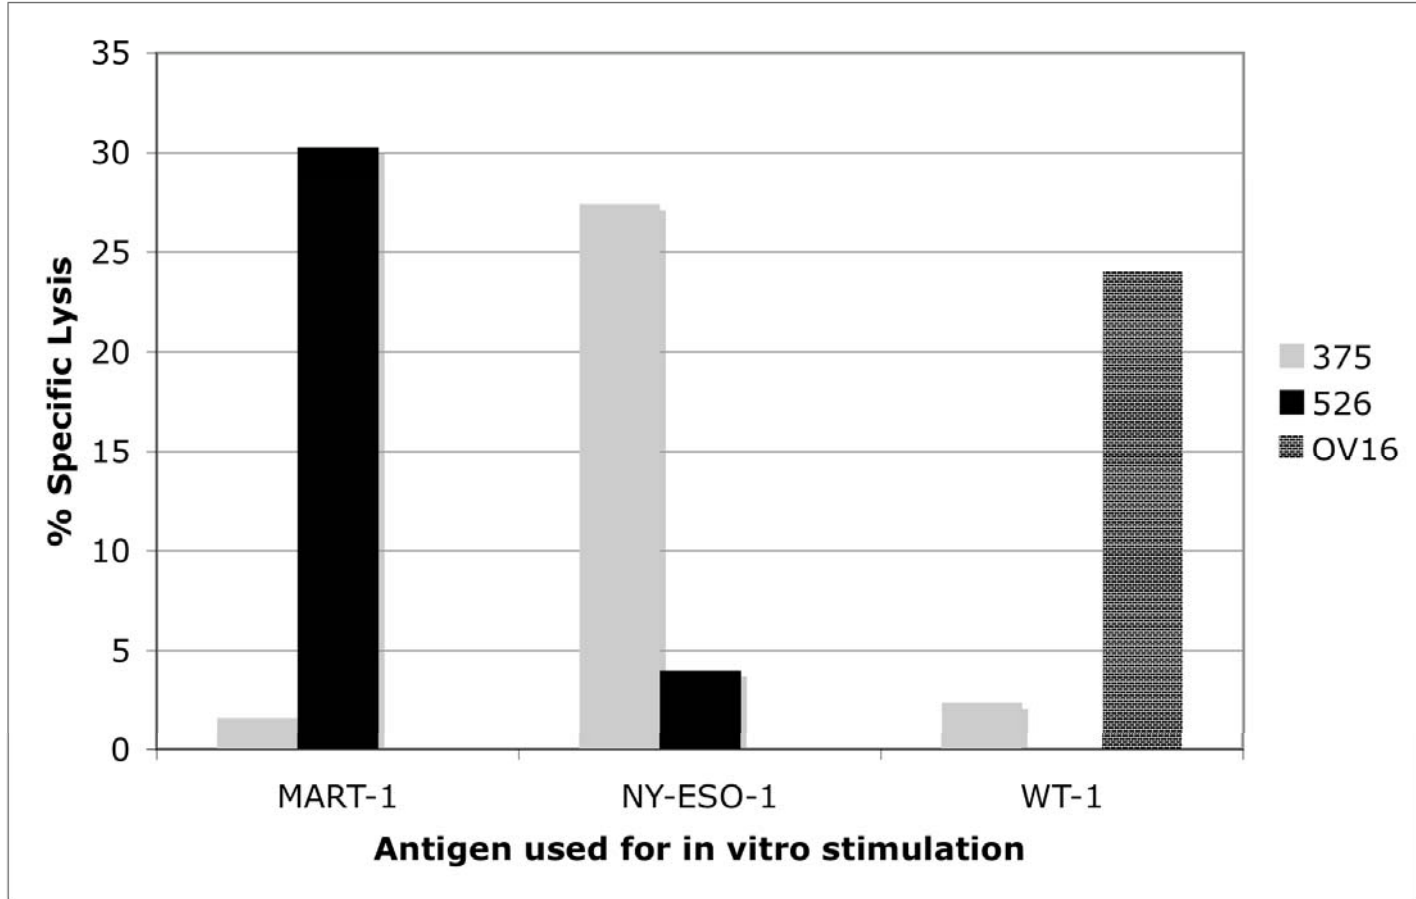

Supplement: blood_blood-2007-05-089375_1.pdf [file blood_blood-2007-05-089375_1.pdf]
